# Supplementary material for: Particulate Matter (PM10) Promotes Cell Invasion through Epithelial–Mesenchymal Transition (EMT) by TGF-β Activation in A549 Lung Cells
Source: MDPI journal article supplement (doi:10.3390/ijms222312632), 2021-11-23
Supplement: s1 [file s1]

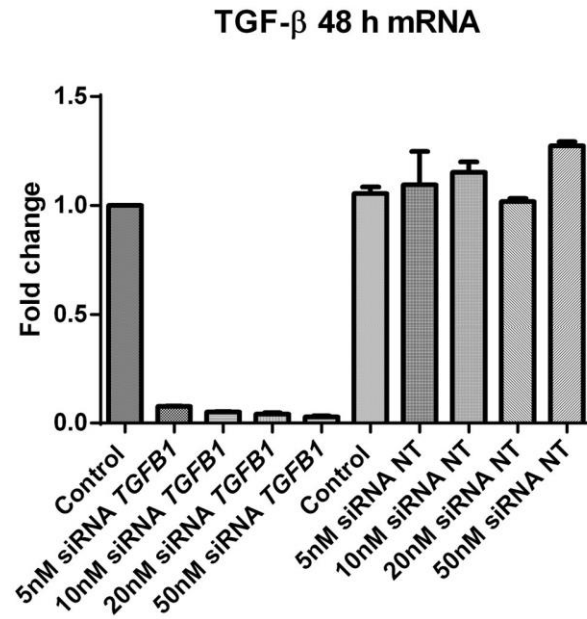

**Supplementary Figure S1.** Dose/response curve of siRNA TGFB1 and non-targeting siRNA in A549 cells after 48 h of transfection. Silencing of TGF- $\beta$  mRNA by siRNA TGFB1 is observed since 5nM to 50 nM, while non-targeting siRNA has no effect in TGF- $\beta$  mRNA silencing at the same doses. The quantitative results were expressed after normalization using GAPDH as a control. Silencing of TGFB1 after siRNA TGFB1 treatment was: 92% for 5 nM; 95% for 10nM; 96% for 20nM and 97% for 50 nM. Data are reported as the means  $\pm$  SD of three in-dependent experiments. The images are representative of the data obtained. (\*) indicates statistically differences between treatments, while (#) indicates statistically differences between similar treatments of both groups. Relative quantification or fold change (FC) was performed using the  $2^{-\Delta\Delta Ct}$ ;  $p < 0.05$ .
